# Supplementary material for: Transcriptome Analysis Reveals Brassinolide Signaling Pathway Control of Foxtail Millet Seedling Starch and Sucrose Metabolism under Freezing Stress, with Implications for Growth and Development
Source: MDPI journal article supplement (doi:10.3390/ijms241411590), 2023-07-18
Supplement: s1 [file s1]

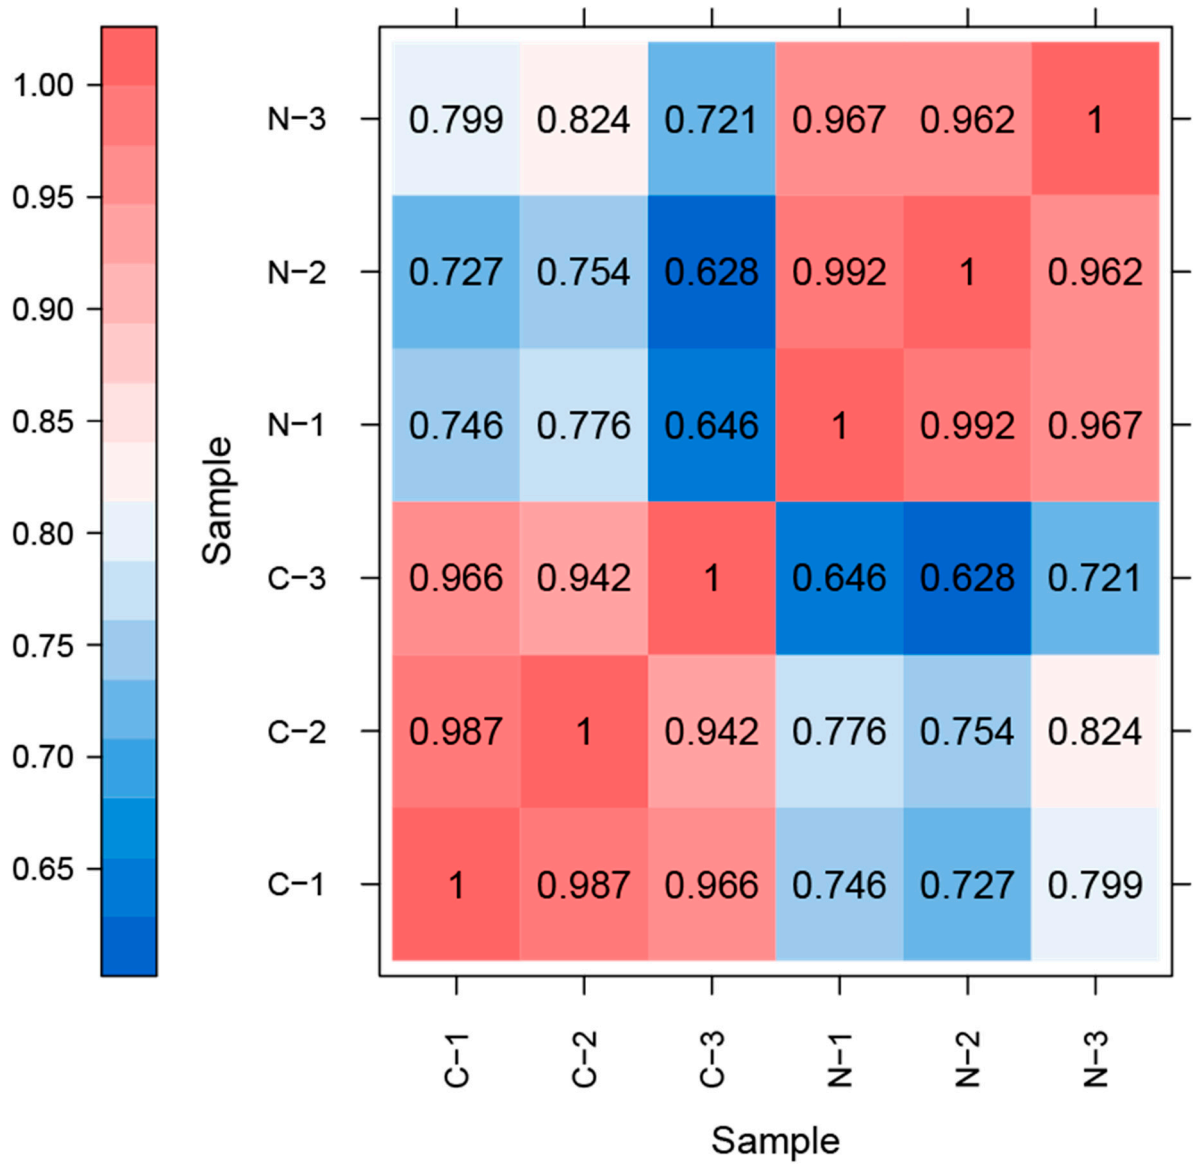

**Figure S1.** Correlations value of each repetition.

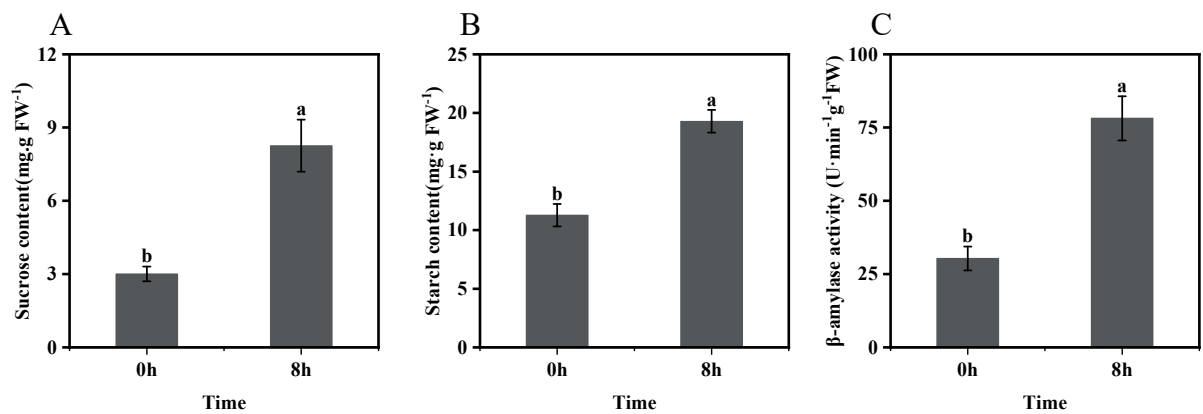

**Figure S2.** Sucrose content (A), Starch content (B) and  $\beta$ -amylase activity (C) of foxtail millet under  $-4^{\circ}\text{C}$  freezing stress.

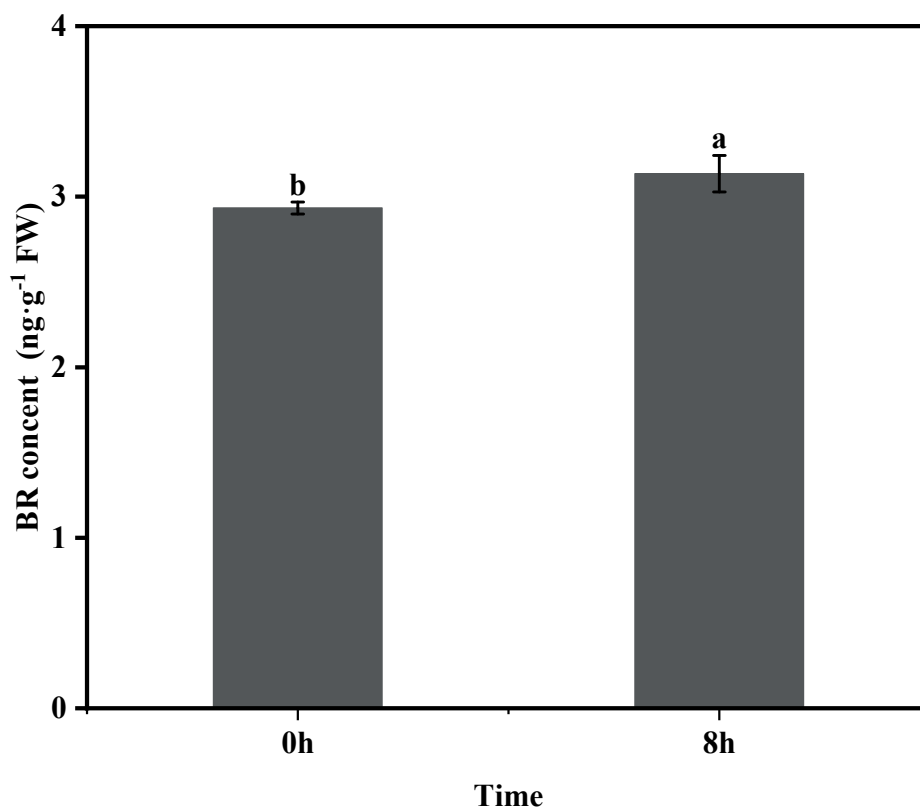

Figure S3. BR content of foxtail millet under -4 °C freezing stress.

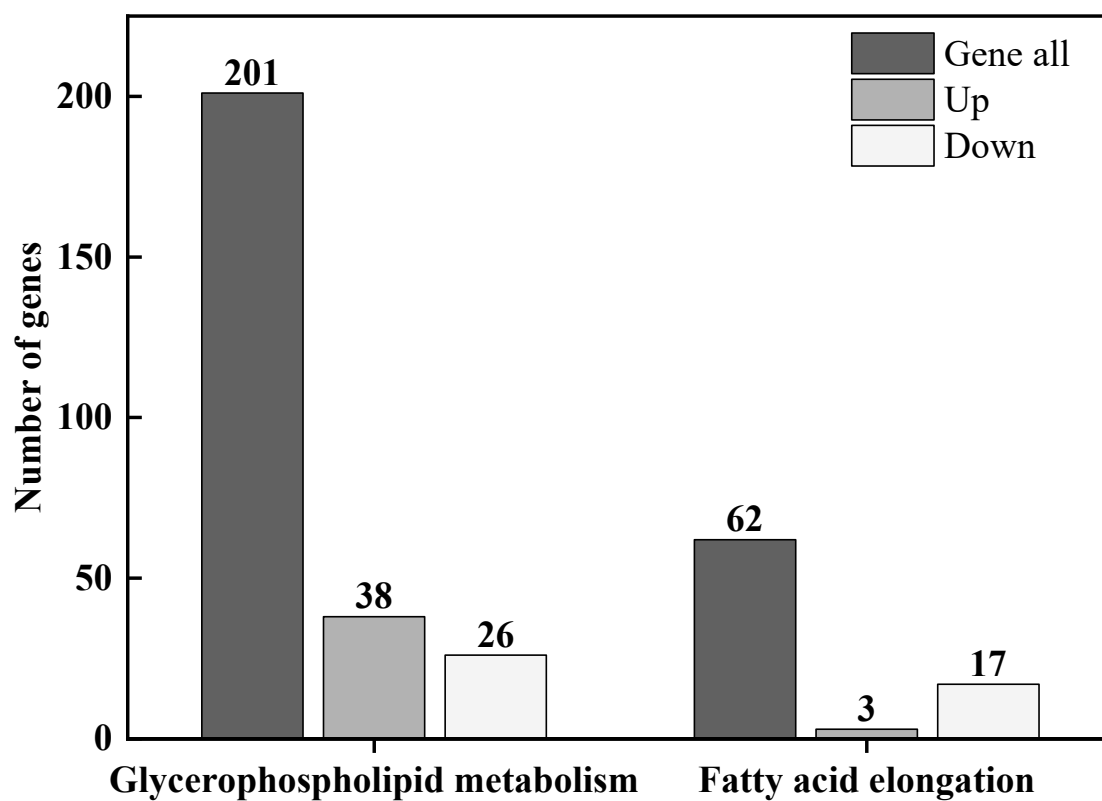

Figure S4. “fatty acid elongation (ko00564)” and “glycerophospholipid metabolism (ko00062)” Statistical map of differential genes.
