# Supplementary material for: Transcriptome Analysis Reveals Brassinolide Signaling Pathway Control of Foxtail Millet Seedling Starch and Sucrose Metabolism under Freezing Stress, with Implications for Growth and Development
Source: MDPI journal article supplement (doi:10.3390/ijms241411590), 2023-07-18
Supplement: s1 [file s1]

Supplementary Table S1

**Table S1.** Primers for qRT-PCR

| Gene ID        | Gene Name      | Forward Primer (5'-3')    | Reverse Primer (5'-3')    |
|----------------|----------------|---------------------------|---------------------------|
| Seita.1G027000 | AP2/ERF        | GCCGTTCTCTTTCCACGAC       | TCGACGAACCCGAAGAGGTC      |
| Seita.1G031300 | PXMP2          | GCAAGTGACATCTTCTCCCTGGAAC | AAGGCATGTACTGGTGGTTGATCC  |
| Seita.1G154200 | WRKY           | GCCTGCCGCCTCCGATTATTAC    | CACCGTGCTGCACTTGTAGTACC   |
| Seita.1G236000 | grxC           | GGCGAATTACAAGGCTGTTGAACTG | GCCACCGATATGTTGCCCTTTAATG |
| Seita.1G257300 | AP2/ERF        | GCAAGTTCGCCGCAGAGATCC     | GGACGAGGAGGACGACGAAGG     |
| Seita.1G347300 | TPS            | CATGTTCTGAGAGCATCGTGTG    | CATCTTGATCACGTCCACGGT     |
| Seita.3G221300 | SCRK           | GCTCAAGATCGACTCCCTTGT     | GCTCAAGATCGACTCCCTTGT     |
| Seita.6G032500 | BRI1           | TGCTCGTGGGCTTGCTTATCTTC   | GTTCTGCTACTCCAGTGCTCAC    |
| Seita.6G181600 | AMY            | CGGGTCGACACAGAAGATGT      | TCGTAGAAGATGCAGGGGAC      |
| Seita.7G045300 | bHLH           | GCGGAGCGGACGAAGAAGATG     | GGTGATGCTGGCGGTGATGAC     |
| Seita.7G240400 | BAK1           | CGGATCTCAAGGTCAGCAACAAGG  | GGATGACTGCGTGGGCGTTTC     |
| Seita.8G202000 | SOD2           | CAAGACCGCTGCCCTATGATGATC  | TCGAAGTGGTTCTGACTCCTCTGG  |
| Seita.9G317500 | BAM            | TGGAGGAGATGAGCAGCAACCC    | TGTAGTCGGCGTAGACCTGGATG   |
| Seita.9G203800 | grxD           | CTGGTTGGTGGTTCCGACATAGTG  | GAAGTGAAGCCGCAACGAGGAG    |
| Seita.9G544600 | BAM            | CAGGAAGAACGGGCTCAAGGTG    | GAAGTCGGCGTAGCACTGGATG    |
| SiActin        | SETIT_026509mg | CGCATATGTGGCTCTTGACT      | GGGCACCTAAATCTCTCTGC      |
